# Supplementary material
Source: PubMed Central journal article supplement (PMC6402799)
Supplement: NIHMS993462-supplement-2.pdf [file NIHMS993462-supplement-2.pdf]

## SUPPLEMENTARY FIGURES

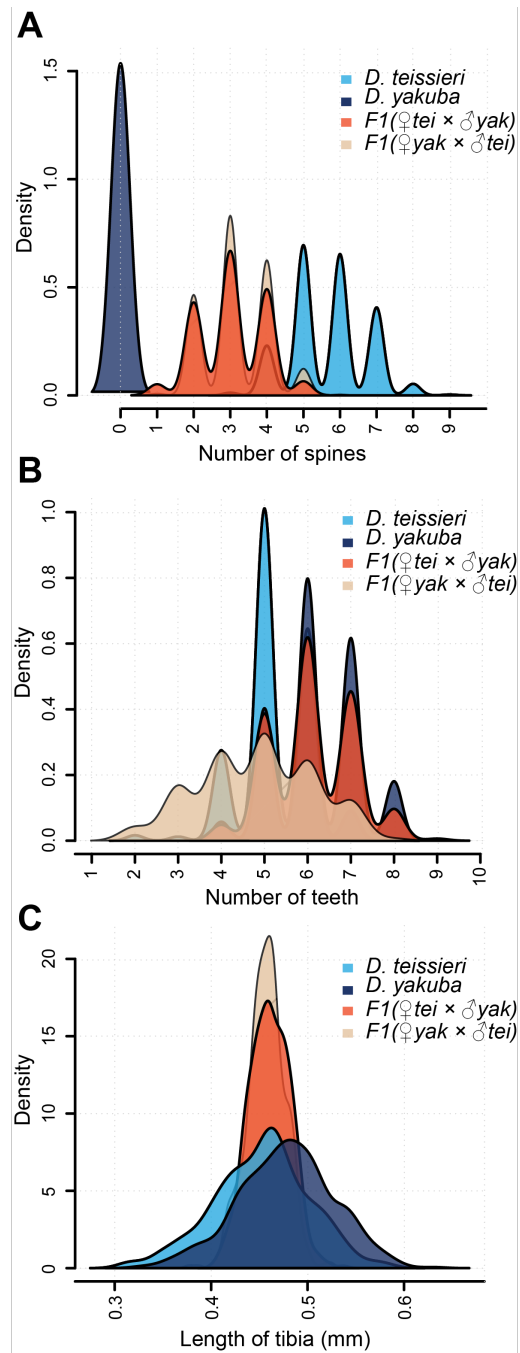

**FIGURE S1. A combination of three phenotypic traits effectively discriminates between *D. yakuba*, *D. teissieri*,  $F_1(\text{♀}tei \times \text{♂}yak)$ , and  $F_1(\text{♀}yak \times \text{♂}tei)$  genotypes. Related to STAR Methods. A) the number of anal spines, B) the number of teeth in sex combs, and C) tibial length (mm). All traits were measured in lab-produced individuals at 24°C. See the text for all statistical analyses. Note that density plots are presented versus histograms for visual clarity, and weights shown for intermediate values are uninformative. These three traits were used to classify field-collected individuals into three categories: *D. yakuba*, *D. teissieri*, and F1 hybrids.**

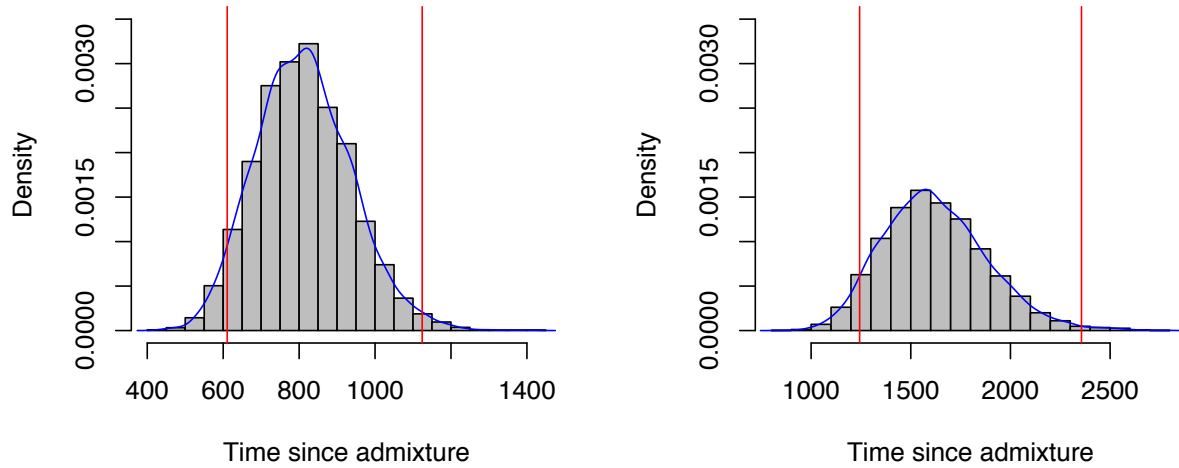

**FIGURE S2. The time since admixture between *D. yakuba* and *D. teissieri* under two different models. Related to STAR methods.** We modeled introgression with **A)** a single pulse of hybridization and **B)** a continuous influx of admixed individuals. Physical distances were converted to genetic distances using the Comeron start point rate [S1]. Note that these genetic distances were measured for *D. melanogaster* and our analyses assume similar recombination rates in orthologous syntenic blocks of *D. melanogaster*, *D. yakuba*, and *D. teissieri*. Red lines show the 95% confidence intervals of the mean divergence time in generations [Single pulse: (610.59, 1124.16); Continuous admixture: (1243.39, 2356.35)].

| 2009       |                     |        |                  |        |         |        |
|------------|---------------------|--------|------------------|--------|---------|--------|
| Altitude   | <i>D. teissieri</i> |        | <i>D. yakuba</i> |        | Hybrids |        |
|            | Open                | Forest | Open             | Forest | Open    | Forest |
| 1,200      | 8                   | 45     | 87               | 2      | 9       | 4      |
| 1,650      | 3                   | 37     | 7                | 9      | 4       | 1      |
| 2009 Total | 11                  | 82     | 94               | 11     | 13      | 5      |
| 2013       |                     |        |                  |        |         |        |
| Altitude   | <i>D. teissieri</i> |        | <i>D. yakuba</i> |        | Hybrids |        |
|            | Open                | Forest | Open             | Forest | Open    | Forest |
| 200        | 0                   | 0      | 141              | 23     | 0       | 0      |
| 650        | 0                   | 5      | 241              | 44     | 0       | 0      |
| 1,200      | 14                  | 311    | 264              | 30     | 24      | 7      |
| 1,420      | 23                  | 201    | 173              | 19     | 44      | 8      |
| 1,650      | 16                  | 284    | 145              | 22     | 15      | 2      |
| 1,850      | 18                  | 154    | 71               | 6      | 28      | 14     |
| 2,020      | 0                   | 50     | 31               | 1      | 2       | 0      |
| 2013 Total | 71                  | 1,005  | 1,066            | 145    | 113     | 31     |

**TABLE S1. The distributions of *D. yakuba*, *D. teissieri*, and their hybrids in open and forest habitats, at different altitudes. Related to Figure 2.** Flies sampled in 2013 were used in the mark-recapture release experiment, and only flies that survived until this experiment are included here. While sampling of each habitat is reported for hybrids, these genotypes were circumscribed to the center of the forest-open habitat ecotone.

| <b>Environmental condition</b> | <b>Factor</b>      | <b>df</b> | <b><i>F</i>-value</b> | <b><i>P</i>-value</b> |
|--------------------------------|--------------------|-----------|-----------------------|-----------------------|
| Temperature                    | Altitude           | 1         | 19.19                 | < 0.0001              |
|                                | Habitat            | 1         | 177.79                | < 0.0001              |
|                                | Altitude × Habitat | 1         | 24.45                 | < 0.0001              |
| Humidity                       | Altitude           | 1         | 519.55                | < 0.0001              |
|                                | Habitat            | 1         | 171.54                | < 0.0001              |
|                                | Altitude × Habitat | 1         | 35.56                 | < 0.0001              |

**TABLE S2. ANCOVA reveals significant effects of both altitude and habitat (open vs. forest) on both temperature and humidity across the island of Bioko. Related to Figure 2.**

| Genotype                                      | <i>N</i> | Mean | SD   | <i>D. yakuba</i> | <i>D. teissieri</i> | F <sub>1</sub> (♀ <i>yak</i> × ♂ <i>tei</i> ) | F <sub>1</sub> (♀ <i>tei</i> × ♂ <i>yak</i> ) |
|-----------------------------------------------|----------|------|------|------------------|---------------------|-----------------------------------------------|-----------------------------------------------|
| <i>D. yakuba</i>                              | 198      | 6.63 | 1.53 |                  | -8.64               | 11.11                                         | -9.45                                         |
| <i>D. teissieri</i>                           | 198      | 4.73 | 1.69 | < <b>0.001</b>   |                     | 2.67                                          | 0.93                                          |
| F <sub>1</sub> (♀ <i>yak</i> × ♂ <i>tei</i> ) | 198      | 4.50 | 1.47 | < <b>0.001</b>   | < <b>0.038</b>      |                                               | 1.77                                          |
| F <sub>1</sub> (♀ <i>tei</i> × ♂ <i>yak</i> ) | 198      | 4.76 | 1.50 | < <b>0.001</b>   | 0.789               | 0.29                                          |                                               |

**TABLE S3. Desiccation resistance of *D. yakuba*, *D. teissieri*, and the two reciprocal hybrids with sexes were pooled. Related to Figure 3.** Sample sizes (*N*), mean time in hours until death, and standard deviations (SD) are reported. The last four columns show our statistical analyses of particular comparisons as a 4 × 4 matrix. The upper triangular matrix shows the z-values from Tukey’s HSD pairwise comparisons, and the lower triangular matrix shows associated *P*-values. Statistically significant differences (*P* < 0.05) are indicated in boldface.

| Temperature regime | Species             | Number of generations per year | Estimated time of admixture (Single pulse model)/years | Estimated time of admixture (continuous model)/years |
|--------------------|---------------------|--------------------------------|--------------------------------------------------------|------------------------------------------------------|
| 15°C/21°C          | <i>D. teissieri</i> | 7.34                           | 83.19-153.16                                           | 169.40-321.03                                        |
| 18°C/24°C          | <i>D. teissieri</i> | 7.79                           | 78.38-144.31                                           | 159.61-302.48                                        |
| 21°C/27°C          | <i>D. teissieri</i> | 8.83                           | 69.15-127.31                                           | 140.81-266.86                                        |
| 26°C/31°C          | <i>D. teissieri</i> | 10.58                          | 57.71-106.25                                           | 117.52-222.72                                        |
| 15°C/21°C          | <i>D. yakuba</i>    | 15.82                          | 38.60-71.06                                            | 78.60-148.95                                         |
| 18°C/24°C          | <i>D. yakuba</i>    | 17.54                          | 34.81- 64.09                                           | 70.89-134.34                                         |
| 21°C/27°C          | <i>D. yakuba</i>    | 23.49                          | 25.99-47.86                                            | 52.93-100.31                                         |
| 26°C/31°C          | <i>D. yakuba</i>    | 26.35                          | 23.17-42.66                                            | 47.19-89.43                                          |

**TABLE S4. Approximate age of the admixture event accounting for differences in generation time due to temperature. Related to STAR methods.** The number of generations per year was inferred by measuring the generation time for both *D. yakuba* and *D. teissieri* under four different temperature regimes. Note that the number of generations per year in *D. teissieri* incorporate the fact that *Parinari* is only found for only half the year.

| Archipelago                                       | Hybrid zone                                         | Reference                    |
|---------------------------------------------------|-----------------------------------------------------|------------------------------|
| Macaronesia                                       | <i>Culex pipiens/ Cx. quinquefasciatus</i>          | [S2,S3]                      |
|                                                   | <i>Drosophila subobscura/D. madeirensis</i>         | [S4]                         |
|                                                   | <i>Argyranthemum broussonetii/A. frutescens</i>     | [S5,S6]                      |
|                                                   | <i>Argyranthemum hierrense/A. haouarytheum</i>      | [S7]                         |
|                                                   | <i>Pericallis appendiculata</i>                     | [S8]                         |
|                                                   | Chromosomal races of <i>Mus musculus domesticus</i> | [S9]                         |
|                                                   | <i>Sideritis cretica cretica</i>                    | [S10]                        |
|                                                   | <i>Sideritis gomerae</i>                            | [S10]                        |
|                                                   | <i>Sideritis canariensis</i>                        | [S10]                        |
|                                                   | Afronesia                                           | <i>D. santomea/D. yakuba</i> |
| <i>D. teissieri/D. yakuba</i>                     |                                                     | This report                  |
| <i>Cercopithecus</i> Monkeys                      |                                                     | [S12]                        |
| <i>Hyperolius molleri/H. thomensis</i>            |                                                     | [S13]                        |
| <i>Schistometopum thomens/S. ephèle</i>           |                                                     | [S14]                        |
| <i>Anopheles gambiae</i> M/S                      |                                                     | [S15]                        |
| <i>Zosterops fidelinus/Speirops brunneus</i>      |                                                     | [S16]                        |
| <i>Neospiza concolor/Speirops rufobrunneus</i>    |                                                     | [S16]                        |
| <i>Psittacus erithacus erithacus/P. e. timneh</i> |                                                     | [S17]                        |

**TABLE S5. Reported hybrid zones in the Macaronesian and Afronesian archipelagos. Both archipelagos have an equal number of reported hybrid zones despite Macronesia having an area five times larger than Afronesia. Related to STAR methods.**

| Species                | $N_{REL}$ | $N_{REC}$ | Mean distance (m) | SD     |
|------------------------|-----------|-----------|-------------------|--------|
| <i>D. yakuba</i>       | 500       | 25        | 84.0              | 94.34  |
| <i>D. teissieri</i>    | 500       | 22        | 45.45             | 67.10  |
| <i>D. melanogaster</i> | 500       | 16        | 93.75             | 99.79  |
| <i>D. simulans</i>     | 500       | 33        | 190.91            | 112.82 |

**TABLE S6. Preliminary releases of *D. melanogaster* subgroup species indicated that flies on average travel less than 200 m in 24 hr. Related to STAR methods and Figure 3. *D. yakuba* and *D. teissieri* travel under 100 m on average in 24 hr. The total number of flies released ( $N_{REL}$ ), the total number of flies recaptured ( $N_{REC}$ ), the mean distance (m) traveled from the release point, and standard deviations (SD) are reported.**

### Supplemental references

- S1. Comeron, J.M., Ratnappan, R., and Bailin, S. (2012). The many landscapes of recombination in *Drosophila melanogaster*. PLoS Genet. 8, e1002905.
- S2. Alves, J., Gomes, B., Rodrigues, R., Silva, J., Arez, A.P., Pinto, J., and Sousa, C.A. (2010). Mosquito fauna on the Cape Verde Islands (West Africa): An update on species distribution and a new finding. J. Vector Ecol. 35, 307–312.
- S3. Gomes, B., Alves, J., Sousa, C.A., Santa-Ana, M., Vieira, I., Silva, T.L., Almeida, A. nio P.G., Donnelly, M.J., and Pinto, J. (2012). Hybridization and population structure of the *Culex pipiens* complex in the islands of Macaronesia. Ecol. Evol. 2, 1889–1902.
- S4. Herrig, D.K., Modrick, A.J., Brud, E., and Llopart, A. (2014). Introgression in the *Drosophila subobscura*-*D. madeirensis* sister species: Evidence of gene flow in nuclear genes despite mitochondrial differentiation. Evolution 68, 705–719.
- S5. Brochmann, C., Borgen, L., and Stabbetorp, O.E. (2000). Multiple diploid hybrid speciation of the Canary Island endemic *Argyranthemum sundingii* (Asteraceae). Plant Syst. Evol. 220, 77–92.
- S6. Fjellheim, S., Jørgensen, M.H., Kjos, M., and Borgen, L. (2009). A molecular study of hybridization and homoploid hybrid speciation in *Argyranthemum* (Asteraceae) on Tenerife, the Canary Islands. Bot. J. Linn. Soc. 159, 19–31.
- S7. Francisco-Ortega, J., Jansen, R.K., and Santos-Guerra, a (1996). Chloroplast DNA evidence of colonization, adaptive radiation, and hybridization in the evolution of the Macaronesian flora. Proc. Natl. Acad. Sci. U. S. A. 93, 4085–4090.
- S8. Jones, K.E., Alfredo Reyes-Betancort, J., Hiscock, S.J., and Carine, M.A. (2014). Allopatric diversification, multiple habitat shifts, and hybridization in the evolution of *Pericallis* (Asteraceae), a macaronesian endemic genus. Am. J. Bot. 101, 637–651.



- S9. Nunes, A.C., Britton-Davidian, J., Catalan, J., Ramalhinho, M.G., Capela, R., Mathias, M.L., and Ganem, G. (2005). Influence of physical environmental characteristics and anthropogenic factors on the position and structure of a contact zone between two chromosomal races of the house mouse on the island of Madeira (North Atlantic, Portugal). *J. Biogeogr.* 32, 2123–2134.
- S10. Barber, J.C., Finch, C.C., Francisco-Ortega, J., Santos-Guerra, A., and Jansen, R.K. (2007). Hybridization in Macaronesian *Sideritis* (Lamiaceae): Evidence from incongruence of multiple independent nuclear and chloroplast sequence datasets. *Taxon* 56, 74–88.
- S11. Llopart, A., Lachaise, D., and Coyne, J.A. (2009). An anomalous hybrid zone in *Drosophila*. *Evolution*, 59, 2602-2607.
- S12. Tosi, A.J., and Hirai, H. (2017). X chromosome introgression and recombination in the *cephus* group of *Cercopithecus* monkeys. *Cytogenet. Genome Res.* 153, 29–35.
- S13. Bell, R.C., Drewes, R.C., and Zamudio, K.R. (2015). Reed frog diversification in the Gulf of Guinea: Overseas dispersal, the progression rule, and in situ speciation. *Evolution* 69, 904–915.
- S14. Stoelting, R.E., Measey, G.J., and Drewes, R.C. (2014). Population genetics of the São Tomé caecilian (gymnophiona: Dermophiidae: *Schistometopum thomense*) reveals strong geographic structuring. *PLoS One* 9, e116005
- S15. Lee, Y., Marsden, C.D., Norris, L.C., Collier, T.C., Main, B.J., Fofana, A., Cornel, A.J., and Lanzaro, G.C. (2013). Spatiotemporal dynamics of gene flow and hybrid fitness between the M and S forms of the malaria mosquito, *Anopheles gambiae*. *Proc. Natl. Acad. Sci. U. S. A.* 110, 19854–1985
- S16. Melo, P. and Pinto, M.F., 2006. Bird speciation in the Gulf of Guinea (Doctoral dissertation, University of Edinburgh).
- S17. Melo, M., and O’Ryan, C. (2007). Genetic differentiation between Príncipe Island and mainland populations of the grey parrot (*Psittacus erithacus*), and implications for conservation. *Mol. Ecol.* 16, 1673–1685.
